# Supplementary material for: Comparative Analysis of Commonly Used Machine Learning Approaches for Li-Ion Battery Performance Prediction and Management in Electric Vehicles
Source: MDPI journal article supplement (doi:10.3390/app14062306), 2024-03-09
Supplement: s1 [file s1]

# Supplementary Materials

## Comparative Analysis of Commonly Used Machine Learning Approaches for Li-Ion Battery Performance Prediction and Management in Electric Vehicles

Saadin Oyucu <sup>1,\*</sup>, Ferdi Doğan <sup>1</sup>, Ahmet Aksöz <sup>2</sup> and Emre Biçer <sup>3</sup>

<sup>1</sup> Department of Computer Engineering, Adıyaman University, 02040 Adıyaman, Türkiye; fdogan@adiyaman.edu.tr

<sup>2</sup> Mobilers Group, Sivas Cumhuriyet University, 58140 Sivas, Türkiye; aaksoz@cumhuriyet.edu.tr

<sup>3</sup> Battery Research Laboratory, Sivas University of Science and Technology, 58010 Sivas, Türkiye; emre.bicer@sivas.edu.tr

\* Correspondence: saadinoyucu@adiyaman.edu.tr

### CONTENTS

|               |   |
|---------------|---|
| Table S1..... | 2 |
| Table S2..... | 4 |
| Table S3..... | 5 |
| Table S4..... | 6 |

**Table S1.** Parameters used in regression-based ML models.

| Model Number | Model Type                  | Preset                          | Model Size (bytes) | Selected Features | Hyperparameters                                                                                                                                                                                                                                  | Optimizer Options |
|--------------|-----------------------------|---------------------------------|--------------------|-------------------|--------------------------------------------------------------------------------------------------------------------------------------------------------------------------------------------------------------------------------------------------|-------------------|
| 1            | Linear Regression           | Linear                          | 6414               | 4                 | Terms: Linear<br>Robust option: Off                                                                                                                                                                                                              | Not applicable    |
| 2            | Linear Regression           | Interactions Linear             | 9462               | 4                 | Terms: Interactions<br>Robust option: Off                                                                                                                                                                                                        | Not applicable    |
| 3            | Linear Regression           | Robust Linear                   | 6958               | 4                 | Terms: Linear<br>Robust option: On                                                                                                                                                                                                               | Not applicable    |
| 4            | Stepwise Linear Regression  | Stepwise Linear                 | 9462               | 4                 | Initial terms: Linear<br>Upper bound on terms: Interactions<br>Maximum number of steps: 1000                                                                                                                                                     | Not applicable    |
| 5            | Kernel                      | SVM Kernel                      | 9212               | 4                 | Learner: SVM<br>Number of expansion dimensions: Auto<br>Regularization strength (Lambda): Auto<br>Kernel scale: Auto<br>Epsilon: Auto<br>Standardize data: Yes<br>Iteration limit: 1000                                                          | Not applicable    |
| 6            | Kernel                      | Least Squares Regression Kernel | 9142               | 4                 | Learner: Least Squares<br>Kernel<br>Number of expansion dimensions: Auto<br>Regularization strength (Lambda): Auto<br>Kernel scale: Auto<br>Standardize data: Yes<br>Iteration limit: 1000                                                       | Not applicable    |
| 7            | Gaussian Process Regression | Rational Quadratic GPR          | 1882692            | 4                 | Basis function: Constant<br>Kernel function: Rational Quadratic<br>Use isotropic kernel: Yes<br>Kernel scale: Automatic<br>Signal standard deviation: Automatic<br>Sigma: Automatic<br>Standardize data: Yes<br>Optimize numeric parameters: Yes | Not applicable    |

|    |                             |                                |         |   |                                                                                                                                                                                                                                                   |                                                                                                                                                |
|----|-----------------------------|--------------------------------|---------|---|---------------------------------------------------------------------------------------------------------------------------------------------------------------------------------------------------------------------------------------------------|------------------------------------------------------------------------------------------------------------------------------------------------|
| 8  | Gaussian Process Regression | Squared Exponential GPR        | 1882661 | 4 | Basis function: Constant<br>Kernel function: Squared Exponential<br>Use isotropic kernel: Yes<br>Kernel scale: Automatic<br>Signal standard deviation: Automatic<br>Sigma: Automatic<br>Standardize data: Yes<br>Optimize numeric parameters: Yes | Not applicable                                                                                                                                 |
| 9  | Gaussian Process Regression | Exponential GPR                | 1882647 | 4 | Basis function: Constant<br>Kernel function: Exponential<br>Use isotropic kernel: Yes<br>Kernel scale: Automatic<br>Signal standard deviation: Automatic<br>Sigma: Automatic<br>Standardize data: Yes<br>Optimize numeric parameters: Yes         | Not applicable                                                                                                                                 |
| 10 | Efficient Linear            | Custom Efficient Linear        | 10866   | 4 | Solver: Auto<br>Relative coefficient tolerance (Beta tolerance): 0,0001                                                                                                                                                                           | Optimizer: Bayesian optimization<br>Training time limit: false<br>Acquisition function: Iterations: 30<br>Expected improvement per second plus |
| 11 | Efficient Linear            | Efficient Linear SVM           | 10934   | 4 | Learner: SVM<br>Solver: Auto<br>Regularization: Auto<br>Regularization strength (Lambda): Auto<br>Relative coefficient tolerance (Beta tolerance): 0,0001<br>Epsilon: Auto                                                                        | Not applicable                                                                                                                                 |
| 12 | Efficient Linear            | Efficient Linear Least Squares | 10894   | 4 | Learner: Least squares<br>Solver: Auto<br>Regularization: Auto                                                                                                                                                                                    | Not applicable                                                                                                                                 |

|    |                  |                         |       |   |                                                                                                                                                                            |                                                                                                                                                |
|----|------------------|-------------------------|-------|---|----------------------------------------------------------------------------------------------------------------------------------------------------------------------------|------------------------------------------------------------------------------------------------------------------------------------------------|
|    |                  |                         |       |   | Regularization strength (Lambda): Auto<br>Relative coefficient tolerance (Beta tolerance): 0,0001                                                                          |                                                                                                                                                |
| 13 | Efficient Linear | Efficient Linear SVM    | 10934 | 4 | Learner: SVM<br>Solver: Auto<br>Regularization: Auto<br>Regularization strength (Lambda): Auto<br>Relative coefficient tolerance (Beta tolerance): 0,0001<br>Epsilon: Auto | Not applicable                                                                                                                                 |
| 14 | Efficient Linear | Custom Efficient Linear | 11577 | 4 | Solver: SGD<br>Relative coefficient tolerance (Beta tolerance): 0,0001                                                                                                     | Optimizer: Bayesian optimization<br>Acquisition function: Iterations: 30<br>Training time limit: false<br>Expected improvement per second plus |

**Table S2.** Parameters of DT-based ML models.

| Model Number | Model Type | Preset        | Model Size (bytes) | Selected Features | Hyperparameters                                                                                                    |
|--------------|------------|---------------|--------------------|-------------------|--------------------------------------------------------------------------------------------------------------------|
| 1            | Tree       | Fine Tree     | 1603830            | 4                 | Minimum leaf size: 4<br>Surrogate decision splits: Off                                                             |
| 2            | Tree       | Medium Tree   | 688034             | 4                 | Minimum leaf size: 12<br>Surrogate decision splits: Off                                                            |
| 3            | Tree       | Coarse Tree   | 237830             | 4                 | Minimum leaf size: 36<br>Surrogate decision splits: Off                                                            |
| 4            | Ensemble   | Boosted Trees | 157041             | 4                 | Minimum leaf size: 8<br>Number of learners: 30<br>Learning rate: 0,1<br>Number of predictors to sample: Select All |
| 5            | Ensemble   | Bagged Trees  | 26304765           | 4                 | Minimum leaf size: 8<br>Number of learners: 30<br>Number of predictors to sample: Select All                       |

**Table S3.** Parameters of SVM-based ML models.

| Model Number | Model Type | Preset              | Model Size (bytes) | Selected Features | Hyperparameters                                                                                                           |
|--------------|------------|---------------------|--------------------|-------------------|---------------------------------------------------------------------------------------------------------------------------|
| 1            | SVM        | Linear SVM          | 1507475            | 4                 | Kernel function: Linear<br>Kernel scale: Automatic<br>Box constraint: Automatic<br>Epsilon: Auto<br>Standardize data: Yes |
| 2            | SVM        | Fine Gaussian SVM   | 1618087            | 4                 | Kernel function: Gaussian<br>Kernel scale: 0,5<br>Box constraint: Automatic<br>Epsilon: Auto<br>Standardize data: Yes     |
| 3            | SVM        | Medium Gaussian SVM | 1619247            | 4                 | Kernel function: Gaussian<br>Kernel scale: 2<br>Box constraint: Automatic<br>Epsilon: Auto<br>Standardize data: Yes       |
| 4            | SVM        | Coarse Gaussian SVM | 1508007            | 4                 | Kernel function: Gaussian<br>Kernel scale: 8<br>Box constraint: Automatic<br>Epsilon: Auto<br>Standardize data: Yes       |

**Table S4.** Hyperparameters of ANN-based models.

| Model Number | Model Type     | Preset                    | Model Size (bytes) | Selected Features | Hyperparameters                                                                                                                                                                                                           | Optimizer Options |
|--------------|----------------|---------------------------|--------------------|-------------------|---------------------------------------------------------------------------------------------------------------------------------------------------------------------------------------------------------------------------|-------------------|
| 1            | Neural Network | Narrow Neural Network     | 5462               | 4                 | Number of fully connected layers: 1<br>First layer size: 10<br>Activation: ReLU<br>Iteration limit: 1000<br>Regularization strength (Lambda): 0<br>Standardize data: Yes                                                  | Not applicable    |
| 2            | Neural Network | Medium Neural Network     | 6182               | 4                 | Number of fully connected layers: 1<br>First layer size: 25<br>Activation: ReLU<br>Iteration limit: 1000<br>Regularization strength (Lambda): 0<br>Standardize data: Yes                                                  | Not applicable    |
| 3            | Neural Network | Wide Neural Network       | 9782               | 4                 | Number of fully connected layers: 1<br>First layer size: 100<br>Activation: ReLU<br>Iteration limit: 1000<br>Regularization strength (Lambda): 0<br>Standardize data: Yes                                                 | Not applicable    |
| 4            | Neural Network | Bilayered Neural Network  | 7262               | 4                 | Number of fully connected layers: 2<br>First layer size: 10<br>Second layer size: 10<br>Activation: ReLU<br>Iteration limit: 1000<br>Regularization strength (Lambda): 0<br>Standardize data: Yes                         | Not applicable    |
| 5            | Neural Network | Trilayered Neural Network | 9062               | 4                 | Number of fully connected layers: 3<br>First layer size: 10<br>Second layer size: 10<br>Third layer size: 10<br>Activation: ReLU<br>Iteration limit: 1000<br>Regularization strength (Lambda): 0<br>Standardize data: Yes | Not applicable    |
